# Supplementary material for: Recycling decoration wastes toward a high-performance porous carbon membrane electrode for supercapacitive energy storage devices
Source: Royal Society of Chemistry journal article supplement (doi:10.1039/d1nj04738h), 2021-11-15
Supplement: d1nj04738h1.pdf [file d1nj04738h1.pdf]

**Electronic Supplementary Information for**  
**Recycling decoration wastes toward a high-performance porous**  
**carbon membrane electrode for supercapacitive energy storage**  
**devices**

Mengxia Cui,<sup>a,b,c</sup> Fang Wang,<sup>a,b,c</sup> Zhengguo Zhang,<sup>a,b,c</sup> Shixiong Min<sup>\*a,b,c</sup>

<sup>a</sup> *School of Chemistry and Chemical Engineering, North Minzu University, Yinchuan, 750021, P. R. China.*

<sup>b</sup> *Key Laboratory of Chemical Engineering and Technology, State Ethnic Affairs Commission, North Minzu University, Yinchuan, 750021, P. R. China.*

<sup>c</sup> *Ningxia Key Laboratory of Solar Chemical Conversion Technology, North Minzu University, Yinchuan 750021, P. R. China.*

*\*Corresponding authors: sxmin@nun.edu.cn*

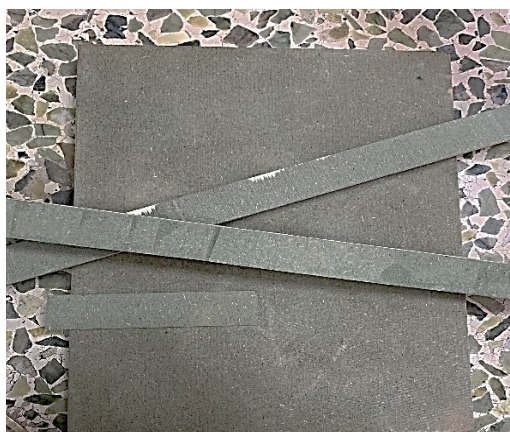

**Fig. S1** The Digital photograph of wooden plastic plates.

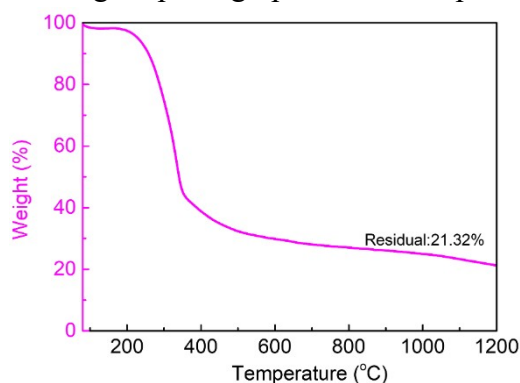

**Fig. S2** TG curve of DWM-1-1000 electrode.

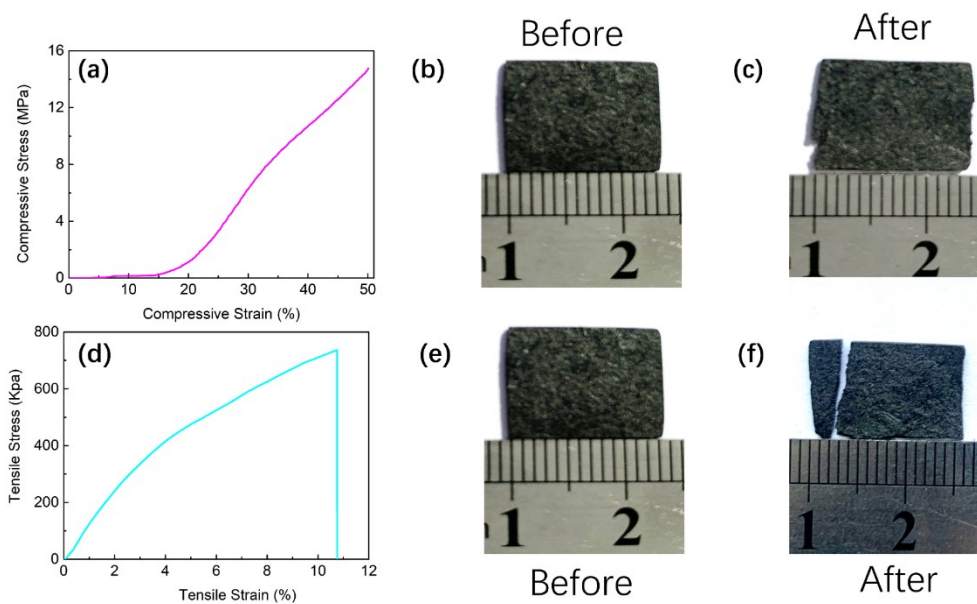

**Fig. S3** (a) Compressive stress-strain curve of the DWCM-1-1000 electrode. (b) The digital photos of the DWCM-1-1000 electrode (b) before and (c) after compressive measurement. (d) Tensile stress-strain curve of DWCM-1-1000 membrane, and (e-f) digital images of DWCM-1-1000 electrode before and after tensile test.

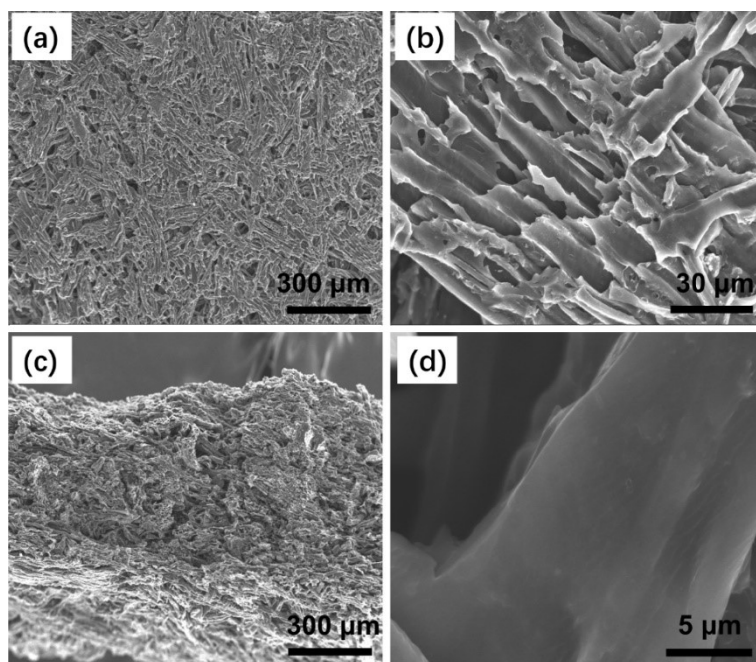

**Fig. S4** (a, b) Top-view and (c, d) side-view SEM images of the DWCM-0-1000 electrode.

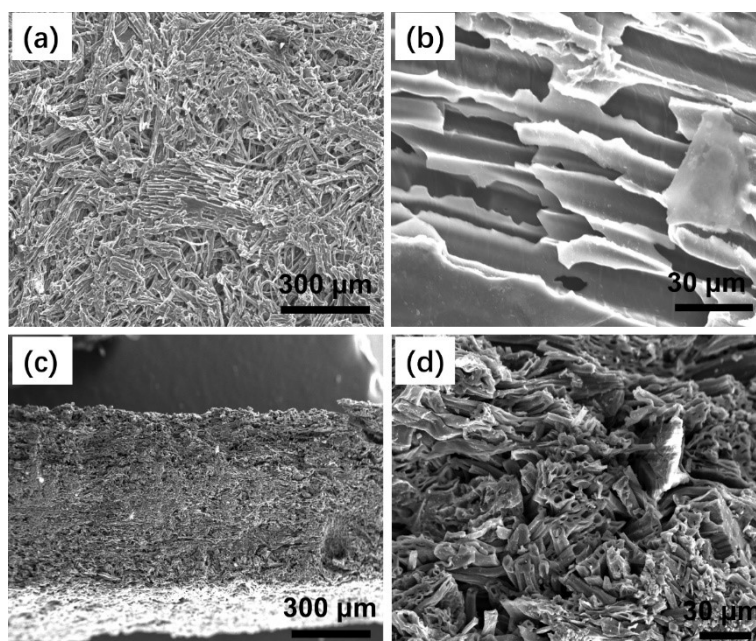

**Fig. S5** (a, b) Top-view and (c, d) side-view SEM images of the DWCM-0.1-1000 electrode.

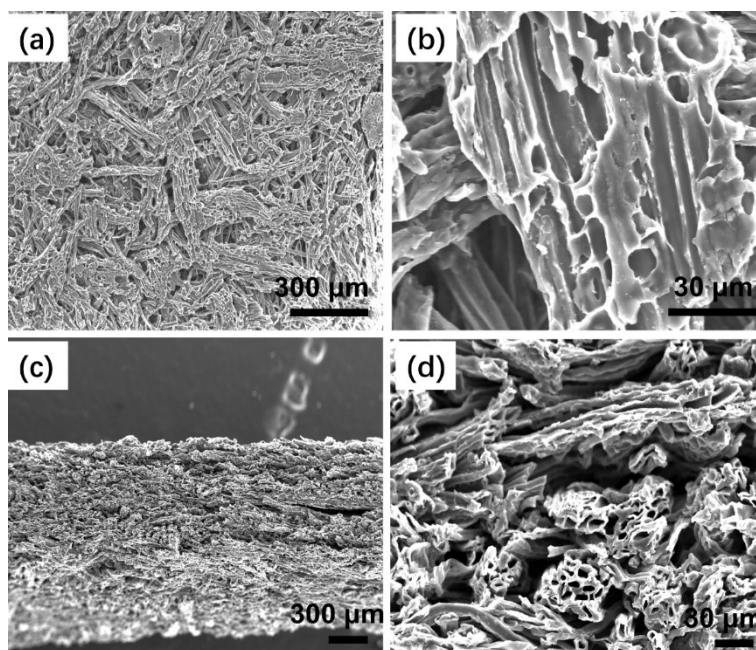

**Fig. S6** (a, b) Top-view and (c, d) side-view SEM images of the DWCM-0.5-1000 electrode.

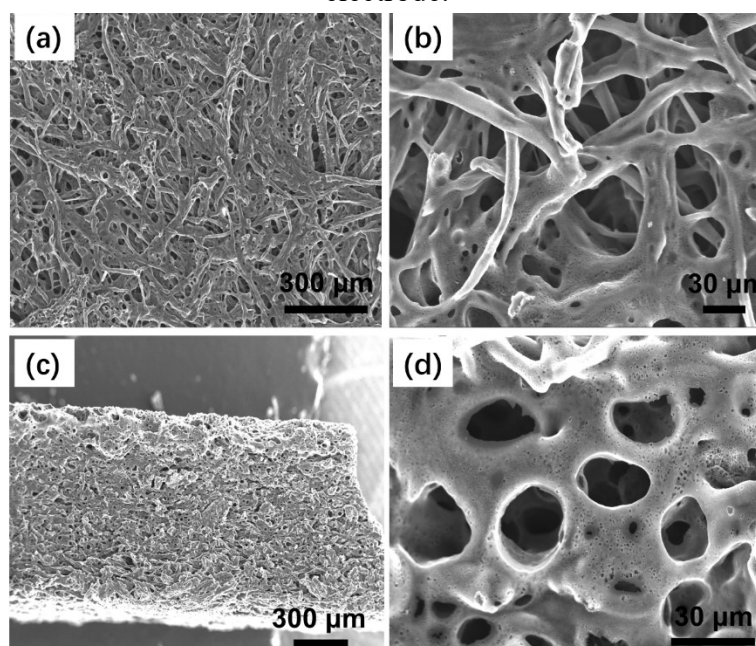

**Fig. S7** (a, b) Top-view and (c, d) side-view SEM images of the DWCM-1-800 electrode.

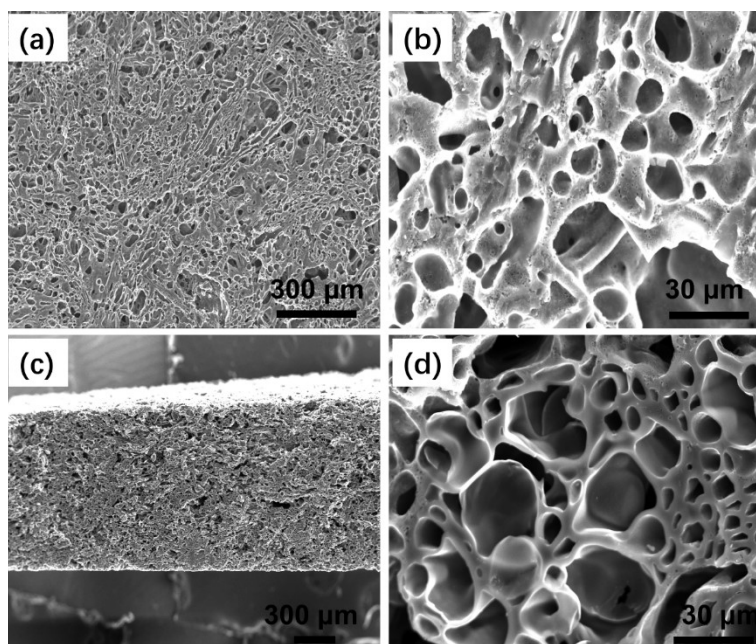

**Fig. S8** (a, b) Top-view and (c, d) side-view SEM images of the DWCM-1-900 electrode.

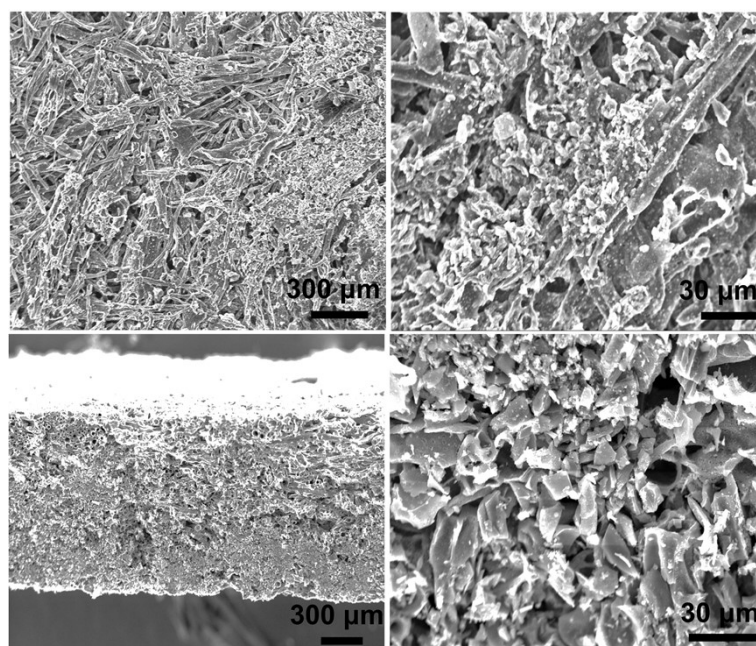

**Fig. S9** (a, b) Top-view and (c, d) side-view SEM images of the DWCM-1-1100 electrode.

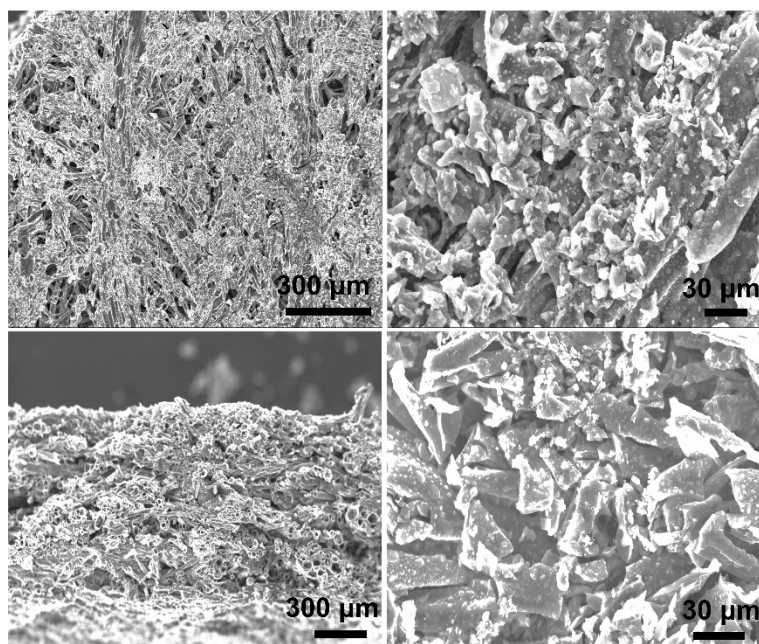

**Fig. S10** (a, b) Top-view and (c, d) side-view SEM images of the DWCM-1-1200 electrode.

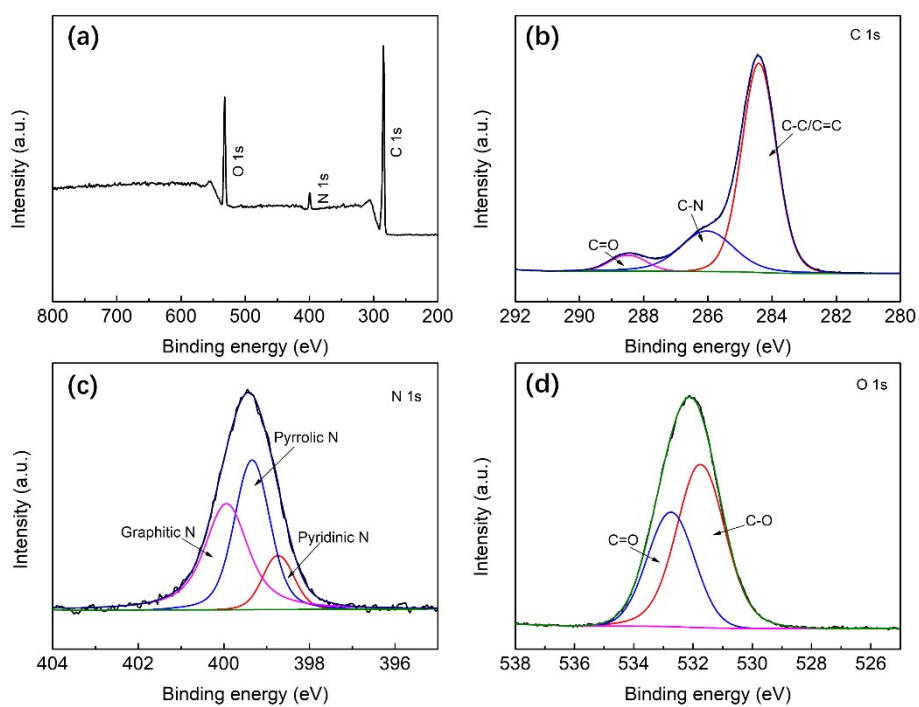

**Fig. S11** (a) XPS survey spectra and high-resolution (b) C 1s, (c) N 1s, and (d) O 1s XPS spectra of the decoration waste (DW).

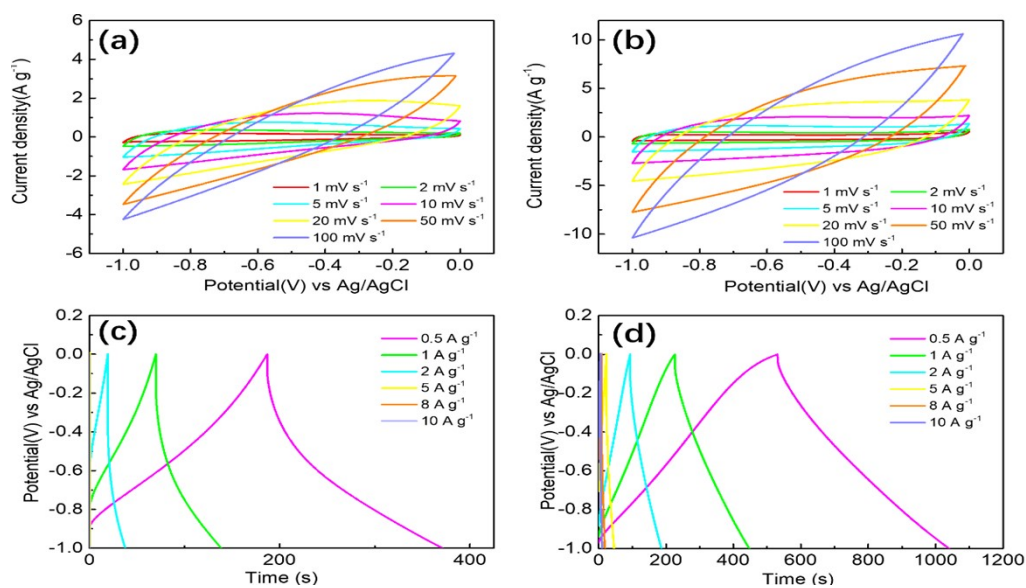

**Fig. S12** CV curves of (a) DWCM-0.1-1000 electrode, (b) DWCM-0.5-1000 electrode in 6 M KOH solution at different scan rates. GCD curves of (c) DWCM-0.1-1000 electrode, (d) DWCM-0.5-1000 electrode at different current densities.

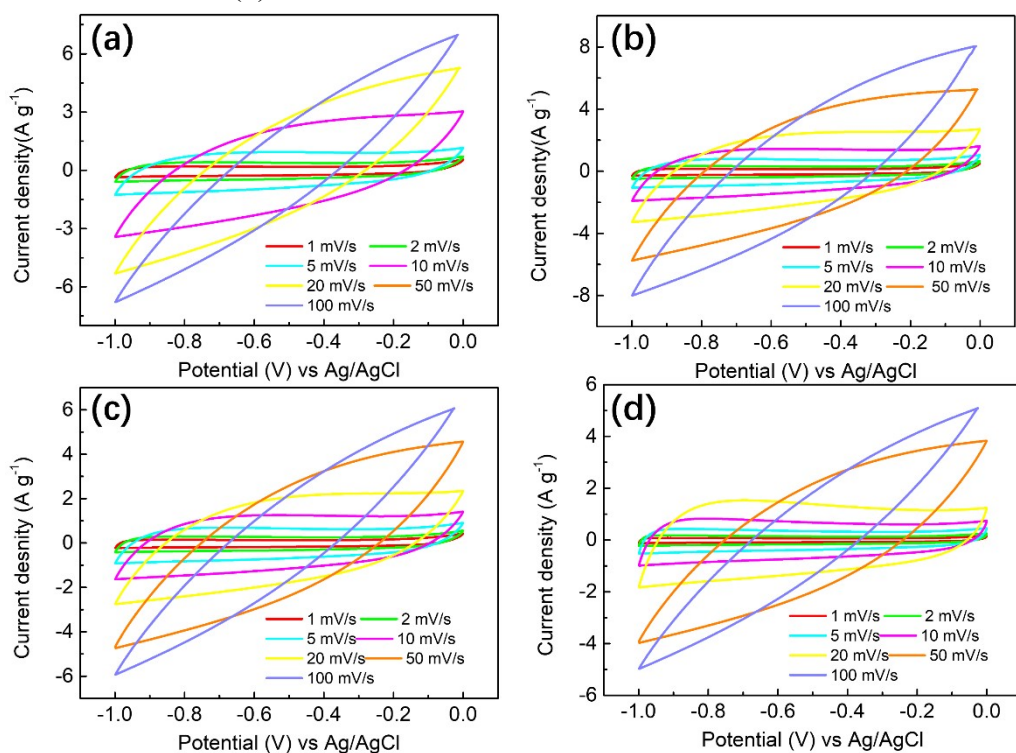

**Fig. S13** CV curves of (a) DWCM-1-800 electrode, (b) DWCM-1-900 electrode, (c) DWCM-1-1100 electrode, and (d) DWCM-1-1200 electrode in 6 M KOH solution at different scan rates.

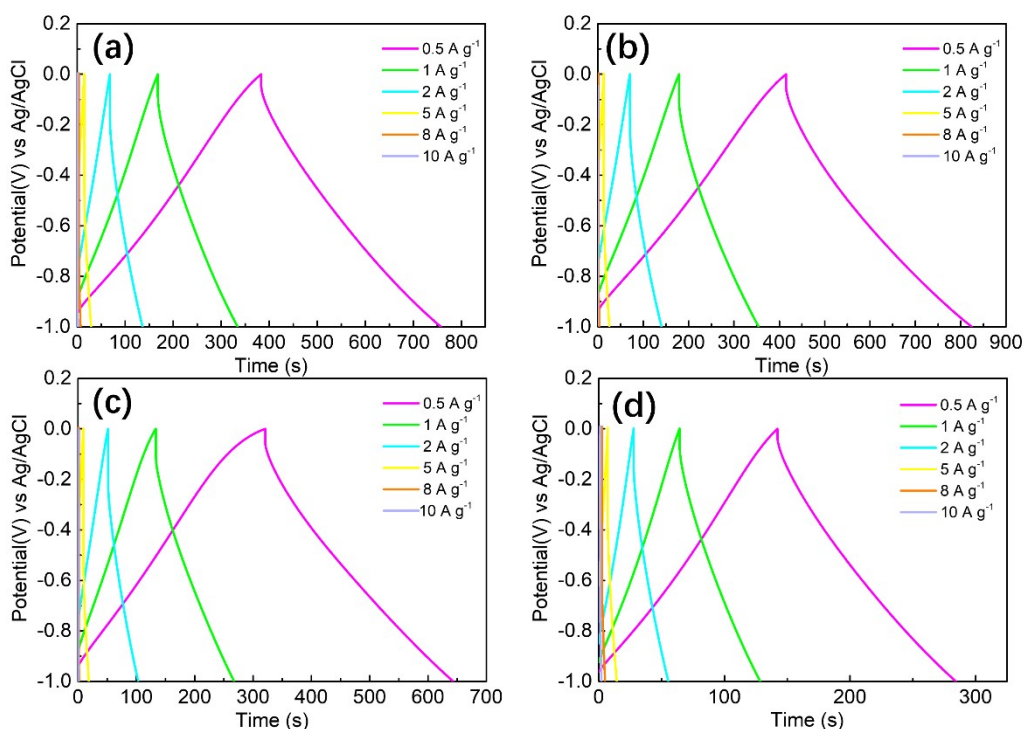

**Fig. S14** GCD curves of (a) DWCM-1-800 electrode, (b) DWCM-1-900 electrode, (c) DWCM-1-1100 electrode, and (d) DWCM-1-1200 electrode at different current densities.

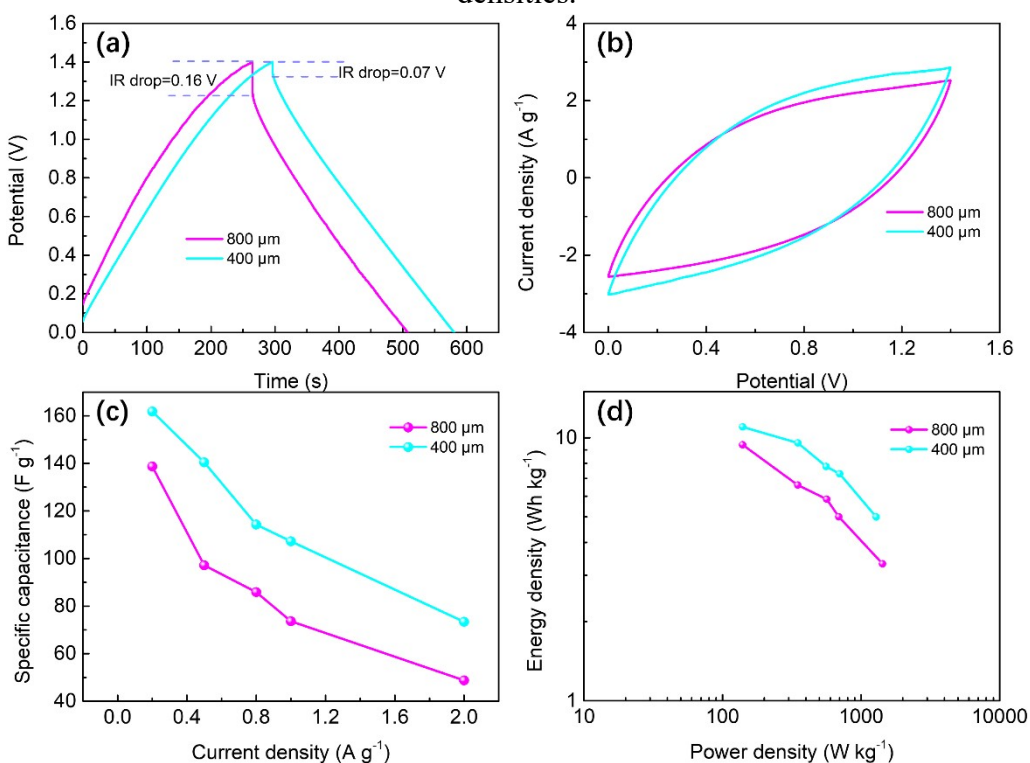

**Fig. S15** (a) GCD curves of DWCM-1-1000 based SC with various thickness. (b) CV curves of DWCM-1-1000 based SC with various thickness. (c) The specific capacitance of DWCM-1-1000 based SC with various thickness at the current densities from 0.2 to 1 A g<sup>-1</sup>. (d) The Ragone plots of DWCM-1-1000 based SC with



various thickness.

**Table S1** Comparison of electrochemical performance of various powders and membrane carbon based symmetric supercapacitor

| Material | Form    | $C_a$ (F g <sup>-1</sup> )       | Cycling stability       | Ref.  |
|----------|---------|----------------------------------|-------------------------|-------|
| PAC-4    | Powders | 43<br>(0.5 A g <sup>-1</sup> )   | 96%<br>(10000 cycles)   | [S1]  |
| SHPC-3   | Powders | 62<br>(0.5 A g <sup>-1</sup> )   | 93.3%<br>(12500 cycles) | [S2]  |
| HPC-2    | Powders | 68.3<br>(1 A g <sup>-1</sup> )   | 86.2%<br>(10000 cycles) | [S3]  |
| ABC-900  | Powders | 78.8<br>(0.5 A g <sup>-1</sup> ) | 92.1%<br>(10000 cycles) | [S4]  |
| LB-900   | Powders | 25<br>(1 A g <sup>-1</sup> )     | 83%<br>(5000 cycles)    | [S5]  |
| TCNF     | Powders | 27.1<br>(0.2 A g <sup>-1</sup> ) | 94.5%<br>(20000 cycles) | [S6]  |
| CLCF     | Powders | 41<br>(1 A g <sup>-1</sup> )     | 90%<br>(5000 cycles)    | [S7]  |
| CNBC     | Powders | 50<br>(1 A g <sup>-1</sup> )     | 97%<br>(5000 cycles)    | [S8]  |
| PGBC     | Powders | 48.1<br>(0.2 A g <sup>-1</sup> ) | 84%<br>(5000 cycles)    | [S9]  |
| C-800    | Powders | 35<br>(1 A g <sup>-1</sup> )     | 97%<br>(1000 cycles)    | [S10] |
| CHNS     | Powders | 64<br>(1 A g <sup>-1</sup> )     | 94%<br>(6000 cycles)    | [S11] |
| P-CNF    | Powders | 25<br>(1 A g <sup>-1</sup> )     | 94%<br>(2000 cycles)    | [S12] |

|                             |          |                                   |                             |           |
|-----------------------------|----------|-----------------------------------|-----------------------------|-----------|
|                             |          |                                   | cycles)                     |           |
| CNF                         | Powders  | 37<br>(0.2 A g <sup>-1</sup> )    | 81.1%<br>(10000<br>cycles)  | [S13]     |
| LCM                         | Membrane | 193.7<br>(1 A g <sup>-1</sup> )   | 96.9%<br>(100000<br>cycles) | [S14]     |
| CDCM                        | Membrane | 150<br>(1 A g <sup>-1</sup> )     | 90%<br>(20000<br>cycles)    | [S15]     |
|                             |          | 138.3<br>(0.2 A g <sup>-1</sup> ) |                             |           |
|                             |          | 97.1<br>(0.5 A g <sup>-1</sup> )  |                             |           |
| DWCM-<br>1-1000<br>(800 μm) | Membrane | 85.9<br>(0.8 A g <sup>-1</sup> )  | 98%<br>(20000<br>cycles)    | This work |
|                             |          | 73.6<br>(1 A g <sup>-1</sup> )    |                             |           |
|                             |          | 48.8<br>(2 A g <sup>-1</sup> )    |                             |           |
|                             |          | 161.8<br>(0.2 A g <sup>-1</sup> ) |                             |           |
|                             |          | 140.4<br>(0.5 A g <sup>-1</sup> ) |                             |           |
| DWCM-<br>1-1000<br>(400 μm) | Membrane | 114.3<br>(0.8 A g <sup>-1</sup> ) | 98%<br>(20000<br>cycles)    | This work |
|                             |          | 107.2<br>(1 A g <sup>-1</sup> )   |                             |           |
|                             |          | 73.4<br>(2 A g <sup>-1</sup> )    |                             |           |

## Supplementary References

[S1]M. Rajesh, R. Manikandan, S. Park, B. C. Kim, W. J. Cho, K. H. Yu, C. J. Raj, Pinecone biomass - derived activated carbon: the potential electrode material for the development of symmetric and asymmetric supercapacitors, *Int. J. Energy Res.* 2020, 44, 8591-8605.

[S2]L. Peng, Y. Liang, H. W. Dong, H. Hu, X. Zhao, Y. J. Cai, Y. Xiao, Y. L. Liu, M. T. Zheng, Super-hierarchical porous carbons derived from mixed biomass wastes

- by a stepwise removal strategy for high-performance supercapacitors, *J. Power Sources* 2018, 377, 151-160.
- [S3] L. L. Qiang, Z. G. Hu, Z. M. Li, Y. Y. Yang, X. T. Wang, Y. Zhou, X. Y. Zhang, W. B. Wang, Q. Wang, Hierarchical porous biomass carbon derived from cypress coats for high energy supercapacitors, *J. Mater. Sci. Mater. Electron.* 2019, 30, 7324-7336.
- [S4] G. X. Zhang, Y. M. Chen, Y. G. Chen, H. B. Guo, Activated biomass carbon made from bamboo as electrode material for supercapacitors, *Mater. Res. Bull.* 2018, 102, 391-398.
- [S5] D. S. Torres, R. R. Rosas, M. J. V. Romero, J. R. Mirasol, T. Cordero, E. Morallón, D. C. Amorós, Asymmetric capacitors using lignin-based hierarchical porous carbons, *J. Power Sources* 2016, 326, 641-651.
- [S6] W. B. Kang, L. Zeng, S. W. Ling, C. Z. Lv, J. F. Liu, R. X. Yuan, C. H. Zhang, Construction of CoO/Co-Cu-S hierarchical tubular heterostructures for hybrid supercapacitors, *Adv. Funct. Mater.* 2021, 31, 2102184.
- [S7] Y. Cheng, L. Huang, X. Xiao, B. Yao, L. Yuan, T. Li, Z. Hu, B. Wang, J. Wan, J. Zhou, Flexible and cross-linked N-doped carbon nanofiber network for high performance freestanding supercapacitor electrode *Nano Energy* 15 (2015) 66-74.
- [S8] X. Hao, J. Wang, B. Ding, Y. Wang, Z. Chang, H. Dou, X. Zhang, Bacterial-cellulose-derived interconnected meso-microporous carbon nanofiber networks as binder-free electrodes for high-performance supercapacitors, *J. Power Sources* 352 (2017) 34-41.
- [S9] Y. Gong, D. Li, C. Luo, Q. Fu, C. Pan, Highly porous graphitic biomass carbon as advanced electrode materials for supercapacitors, *Green Chem.* 19 (2017) 4132-4140.
- [S10] A. Gopalakrishnam, S. Badhulika, Ultrathin graphene-like 2D porous carbon nanosheets and its excellent capacitance retention for supercapacitor *J. Ind. Eng. Chem.* 68 (2018) 25.
- [S11] P. Schlee, O. Hosseinaei, D. Baker, A. Landmér, P. Tomani, M. J. Mostazo-López, D. Cazorla-Amorós, S. Herou, M.-M. Titirici, From waste to wealth: from

kraft lignin to free-standing supercapacitors, *Carbon* 145 (2019) 470.

- [S12] Y. Liu, J. Zhou, L. Chen, P. Zhang, W. Fu, H. Zhao, Y. Ma, X. Pan, Z. Zhang, W. Han, E. Xie, Highly flexible freestanding porous carbon nanofibers forelectrodes materials of high-performance all-carbon supercapacitors, *ACS Appl. Mater. Interfaces* 2015, 7, 23515.
- [S13] Q. Li, W. Xie, D. Liu, Q. Wang, D. He, Nitrogen and oxygen co-doped carbon nanofibers with rich sub-nanoscale pores as self-supported electrode material of high-performance supercapacitors, *Electrochim. Acta* 222 (2016) 1445.
- [S14] J. W. Liu, S. X. Min, F. Wang, Z. G. Zhang, High-performance aqueous supercapacitors based on biomass - derived multiheteroatom self-doped porous carbon membranes, *Energy Technol.* 8 (2020) 2000391.
- [S15] J. W. Liu, S. X. Min, F. Wang, Z. G. Zhang, Biomass-derived three-dimensional porous carbon membrane electrode for high-performance aqueous supercapacitors: An alternative of powdery carbon materials, *J. Power Sources* 466 (2020) 228347.
